# Supplementary material for: A Microdeletion of Chromosome 9q33.3 Encompasses the Entire LMX1B Gene in a Chinese Family with Nail Patella Syndrome
Source: MDPI journal article supplement (doi:10.3390/ijms151120158), 2014-11-05

# Supplementary Information

Figure S1. Capillary electrophoresis pattern of MLPA analysis.

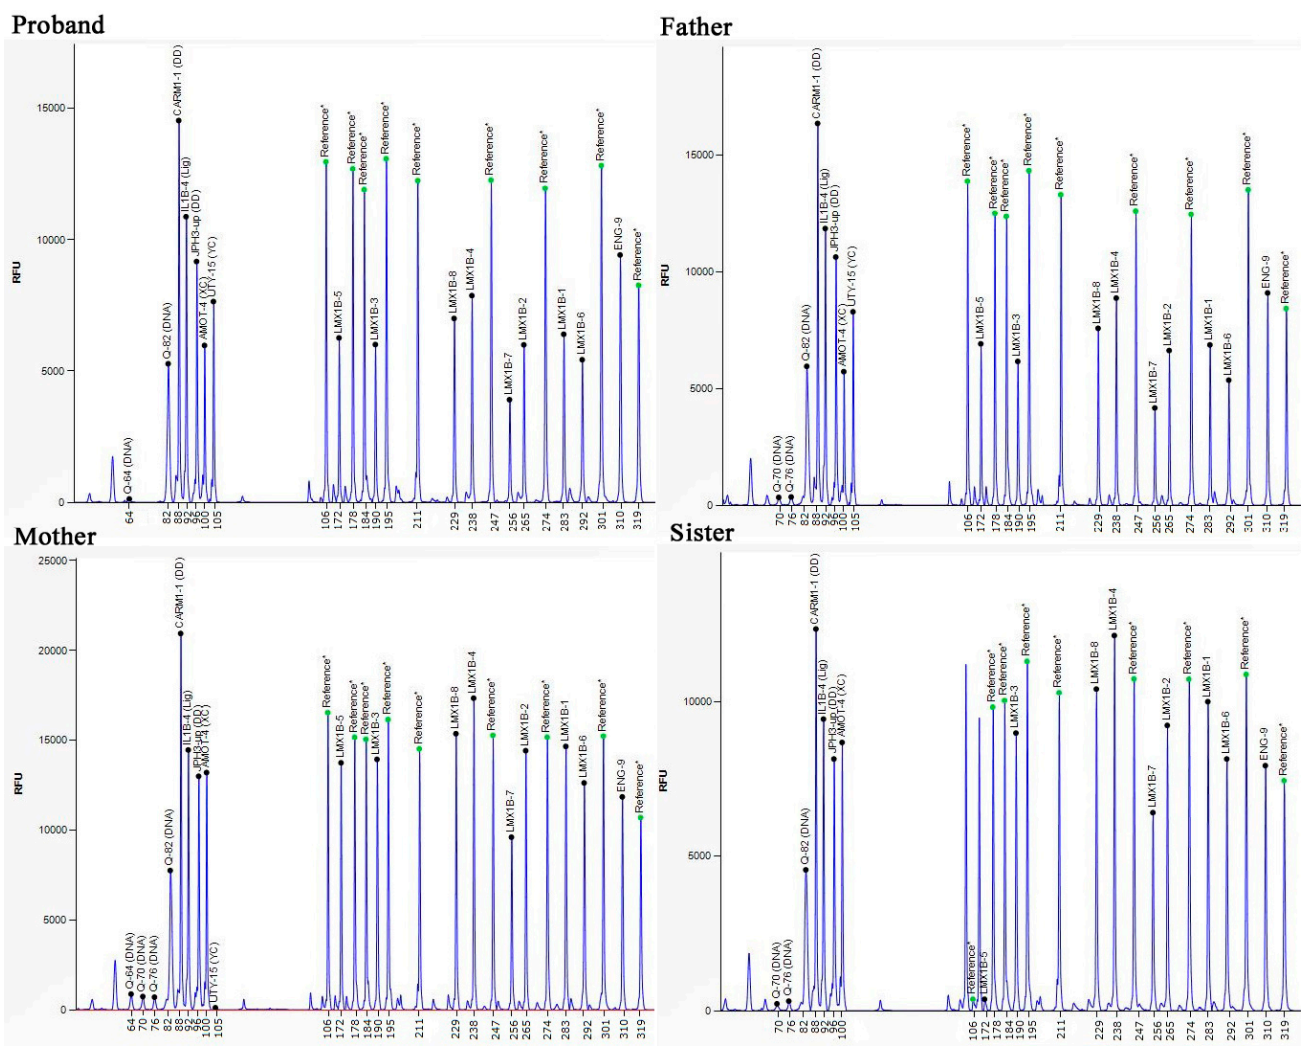

Supplement: s1 [file s1]
